# Supplementary material for: Optimizing the Expression of Human Dopamine Receptors in Escherichia coli
Source: MDPI journal article supplement (doi:10.3390/ijms22168647), 2021-08-11
Supplement: s1 [file s1]

# **Optimizing the Expression of Human Dopamine Receptors in**

## ***Escherichia coli***

Vanessa Boritzki<sup>1</sup>, Harald Hübner<sup>2</sup>, Anni Allikalt<sup>2</sup>, Peter Gmeiner<sup>2</sup>, Birgitta M. Wöhrl<sup>1</sup>

<sup>1</sup> Department of Biochemistry IV - Biopolymers, Universität Bayreuth, Universitätsstr. 30, D-95447 Bayreuth, Germany

<sup>2</sup> Department of Chemistry and Pharmacy, Medicinal Chemistry, Friedrich-Alexander-Universität Erlangen-Nürnberg, Nikolaus-Fiebiger Str. 10, 91058 Erlangen, Germany.

## Supplementary Tables and Figures

### Tables

**Table S1.** Oligodeoxynucleotides used for error prone PCR of D<sub>3</sub> and CPEC.

| # | 5'→3'                       |
|---|-----------------------------|
| 1 | AAGACGCGCAGACTCATATG        |
| 2 | CCTTGAAAATACAGGTTTTCAAGCTT  |
| 3 | AAGCTTGAAAACCTGTATTTTCAAGGC |
| 4 | CATATGAGTCTGCGCGTCTTTCAG    |

### Figures

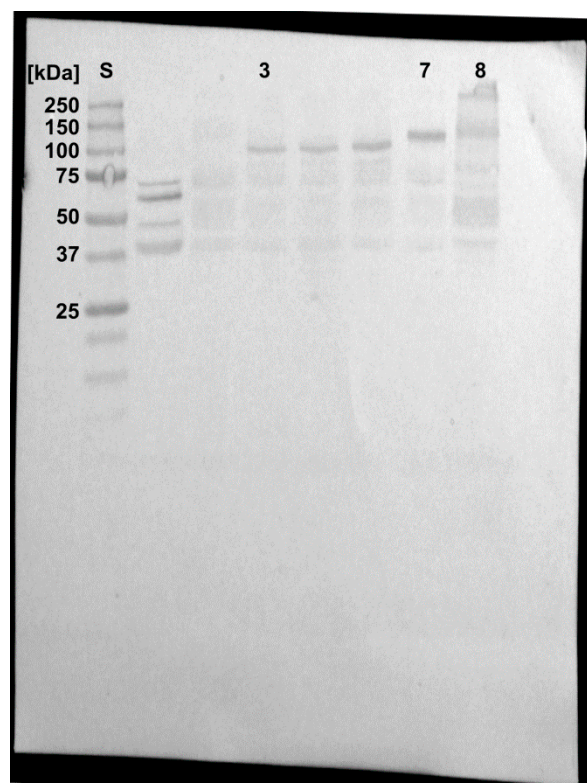

**Figure S1.** Expression analysis for D<sub>2S</sub> expressed from different promoters and of a thermostabilized variant. Original image of the Western blot against the N-terminal MBP. S, molecular weight standard, the molecular weights of the standard proteins are indicated on the left. Numbers on top of the gel indicate construct numbers: **3**, *lac*-MBP-D<sub>2Swt</sub>-mCherry; **7**, *tac*-MBP-D<sub>2Swt</sub>-mCherry; **8**, *lac*-MBP-D<sub>2S</sub>I122A,L346A,L350A-mCherry.

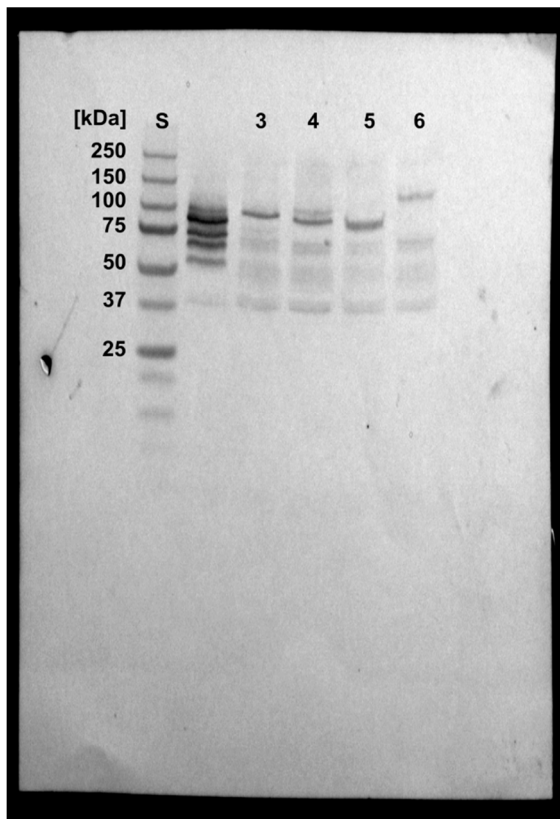

**Figure S2.** Original image of the Western Blot presented in Figure 2. Western Blot against the N-terminal MBP. S, molecular weight standard, the molecular weights of the standard proteins are indicated on the left. Numbers on top of the gel indicate construct numbers: **3** *lac*-MBP-D<sub>2Swt</sub>-mCherry, **4** *lac*-MBP-D<sub>2Swt</sub>-sfGFP, **5** *lac*-MBP-D<sub>2Swt</sub>-TrxA, **6** *lac*-MBP-D<sub>2Swt</sub>-G<sub>ai1</sub>.

(a)

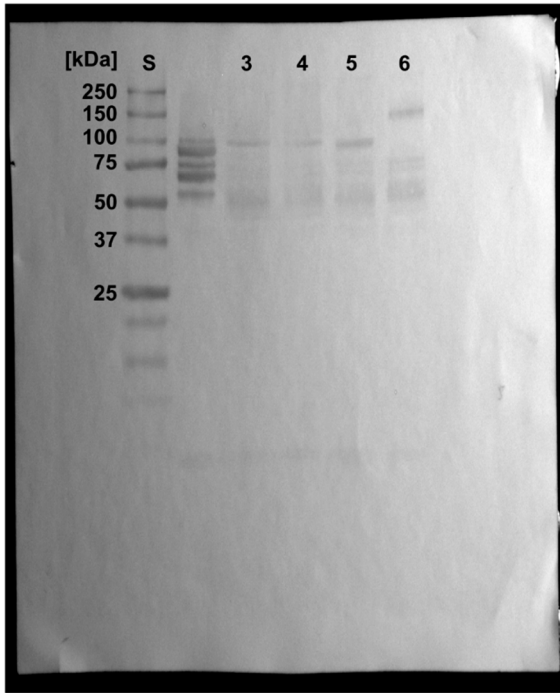

(b)

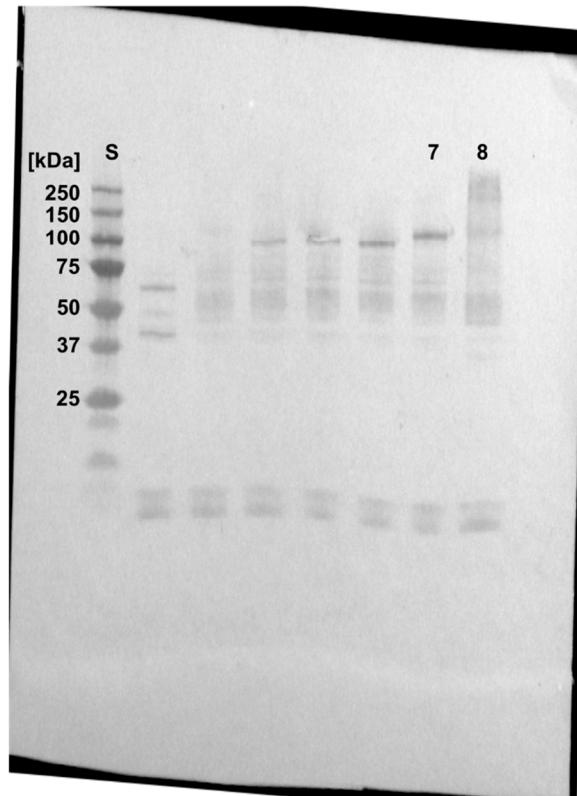

**Figure S3.** Original images of the Western Blots presented in Figure 4. Western Blots against the N-terminal MBP. S, molecular weight standard, the molecular weights of the standard proteins are indicated on the left. Numbers on top of the gel indicate construct numbers. **(a)** **3** *lac*-MBP-D<sub>2Swt</sub>-mCherry, **4** *lac*-MBP-D<sub>2Swt</sub>-sfGFP, **5** *lac*-MBP-D<sub>2Swt</sub>-TrxA, **6** *lac*-MBP-D<sub>2Swt</sub>-G<sub>ai1</sub>. **(b)** **7** *lac*-MBP-D<sub>2S</sub>I122A,L346A,L350A-mCherry, **8** *tac*-MBP-D<sub>2Swt</sub>-mCherry.

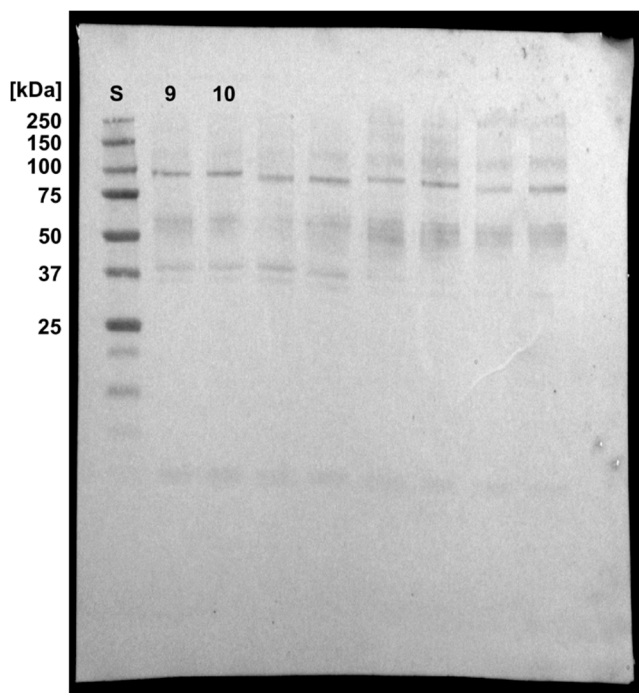

**Figure S4.** Original image of the Western Blot presented in Figure 5. Western Blot against the N-terminal MBP. S, molecular weight standard, the molecular weights of the standard proteins are indicated on the left. Numbers on top of the gel indicate construct numbers: **9** *lac*-MBP-D<sub>3wt</sub>-mCherry, **10** *lac*-MBP- D<sub>3 L119W</sub>-mCherry.

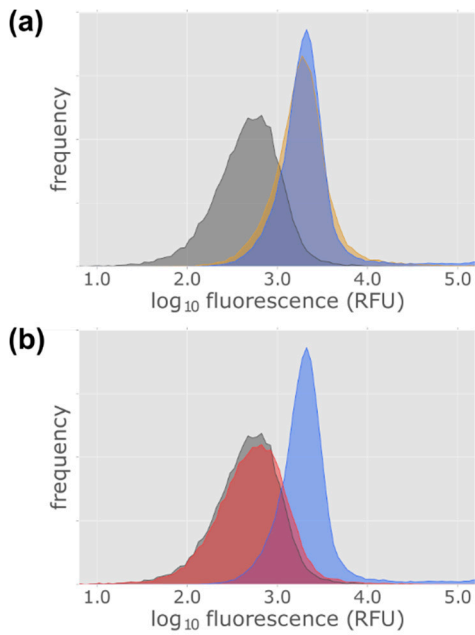

**Figure S5.** The  $D_3$  ligand haloperidol can displace the fluorescent ligand NMP130. **(a)** FACS analysis at excitation and emission wave lengths of 488 and 525 nm showed that 8 % ethanol in the labeling reaction does not significantly alter binding of NMP130 to the  $D_3$  receptor (control). Grey: without induction, yellow: after induction with 0.5 mM IPTG for 4 h, blue: after induction with 0.5 mM IPTG for 4 h and labeling reaction containing 8 % ethanol (see Material & Methods for further details). **(b)** Specific binding of NMP130 to the  $D_{3wt}$  receptor was confirmed by displacement with haloperidol. Grey: without induction, blue: after induction with 0.5 mM IPTG for 4 h and labeling reaction containing 8 % ethanol (Fig. S5a), red: after induction with 0.5 mM IPTG for 4 h and labeling reaction containing a 4000-fold excess of haloperidol.
